# Supplementary material for: In‐depth comparative analysis of Illumina® MiSeq run metrics: Development of a wet‐lab quality assessment tool
Source: PubMed Central journal article supplement — Mol Ecol Resour. 2019 Jan 17;19(2):377–87. doi: 10.1111/1755-0998.12973 (PMC6487961; doi:10.1111/1755-0998.12973), 2019-01-17

# MOLECULAR ECOLOGY RESOURCES

## Supplemental Information for:

### **In-Depth Comparative Analysis of Illumina® MiSeq Run Metrics: Development of a Wet-lab Quality Assessment Tool**

George John Kastanis, Luis V. Santana-Quintero, Maria Sanchez-Leon, Sara Lomonaco,  
Eric W. Brown and Marc W. Allard

#### **Table of Contents:**

|                  |        |
|------------------|--------|
| <b>Table S1</b>  | Page 2 |
| <b>Table S2</b>  | Page 3 |
| <b>Figure S1</b> | Page 4 |
| <b>Figure S2</b> | Page 5 |
| <b>Figure S3</b> | Page 6 |

1  
2  
3  
4  
5  
6  
7  
8  
9  
10  
11  
12  
13  
14  
15  
16  
17  
18  
19  
20  
21  
22  
23  
24  
25  
26  
27  
28  
29  
30  
31  
32

# MOLECULAR ECOLOGY

## RESOURCES

33  
34  
35  
36  
37

**Table S1. Eigenvalues of the PCA components.** The first five principal components, indicated in bold, contain 86.41% of the variability of the 486 MiSeq run data set.

| <b>Principal Component</b> | <b>Eigenvalue</b> | <b>Percentage of Variance</b> | <b>Cumulative</b> |
|----------------------------|-------------------|-------------------------------|-------------------|
| <b>1</b>                   | <b>5.164</b>      | <b>34.43%</b>                 | <b>34.43%</b>     |
| <b>2</b>                   | <b>4.244</b>      | <b>28.29%</b>                 | <b>62.72%</b>     |
| <b>3</b>                   | <b>1.52</b>       | <b>10.13%</b>                 | <b>72.86%</b>     |
| <b>4</b>                   | <b>1.213</b>      | <b>8.09%</b>                  | <b>80.95%</b>     |
| <b>5</b>                   | <b>0.82</b>       | <b>5.47%</b>                  | <b>86.41%</b>     |
| 6                          | 0.522             | 3.48%                         | 89.89%            |
| 7                          | 0.45              | 3.00%                         | 92.89%            |
| 8                          | 0.353             | 2.35%                         | 95.25%            |
| 9                          | 0.3               | 2.00%                         | 97.25%            |
| 10                         | 0.173             | 1.15%                         | 98.40%            |
| 11                         | 0.118             | 0.78%                         | 99.19%            |
| 12                         | 0.063             | 0.42%                         | 99.61%            |
| 13                         | 0.045             | 0.30%                         | 99.90%            |
| 14                         | 0.009             | 0.06%                         | 99.97%            |
| 15                         | 0.005             | 0.03%                         | 100.00%           |

# MOLECULAR ECOLOGY RESOURCES

38  
39  
40 **Table S2. PCA coefficient table of the extracted Eigenvalues of the 15 selected MiSeq run metrics.** The top three PCA coefficients  
41 for each principal component are in bold.  
42

|                                            | Coefficients of |              |              |               |               |
|--------------------------------------------|-----------------|--------------|--------------|---------------|---------------|
|                                            | PC1             | PC2          | PC3          | PC4           | PC5           |
| Clusters PF                                | 0.168           | 0.287        | 0.272        | -0.283        | 0.066         |
| <b>%<math>\geq</math>Q30<br/>(Overall)</b> | 0.188           | <b>0.400</b> | -0.092       | 0.145         | 0.130         |
| <b>%<math>\geq</math>Q30 (R1)</b>          | 0.186           | <b>0.378</b> | -0.177       | 0.209         | -0.002        |
| <b>%<math>\geq</math>Q30 (IR1)</b>         | 0.200           | 0.225        | <b>0.383</b> | -0.132        | 0.010         |
| <b>%<math>\geq</math>Q30 (IR2)</b>         | 0.254           | 0.204        | 0.233        | <b>-0.332</b> | 0.124         |
| <b>%<math>\geq</math>Q30 (R2)</b>          | 0.178           | <b>0.382</b> | -0.045       | 0.092         | <b>0.214</b>  |
| <b>Phasing (R1)</b>                        | -0.162          | -0.158       | 0.018        | 0.120         | <b>0.939</b>  |
| <b>Prephasing (R1)</b>                     | -0.166          | -0.220       | <b>0.383</b> | <b>-0.437</b> | 0.088         |
| <b>Phasing (R2)</b>                        | -0.155          | 0.103        | <b>0.403</b> | <b>0.598</b>  | -0.014        |
| <b>Prephasing (R2)</b>                     | -0.177          | 0.008        | <b>0.585</b> | 0.295         | <b>-0.143</b> |
| <b>Total Reads</b>                         | 0.328           | -0.300       | 0.020        | 0.143         | 0.027         |
| <b>Reads PF</b>                            | <b>0.386</b>    | -0.205       | 0.120        | 0.054         | 0.024         |
| <b>Total Yield</b>                         | <b>0.383</b>    | -0.217       | 0.108        | 0.053         | 0.005         |
| <b>Q30 Yield</b>                           | <b>0.412</b>    | -0.128       | 0.063        | 0.051         | 0.063         |
| <b>Cluster Density</b>                     | 0.289           | -0.311       | -0.039       | 0.202         | -0.044        |

43  
44  
45  
46

# MOLECULAR ECOLOGY RESOURCES

47  
48  
49 **Figure S1. Scree plot of the 15 observed MiSeq run metrics.** The Scree plot generated shows its characteristic “elbow” in the vicinity  
50 of the fifth component out of the 15. This signifies that the majority of the data can be expressed using only the first five components of  
51 the data set.  
52

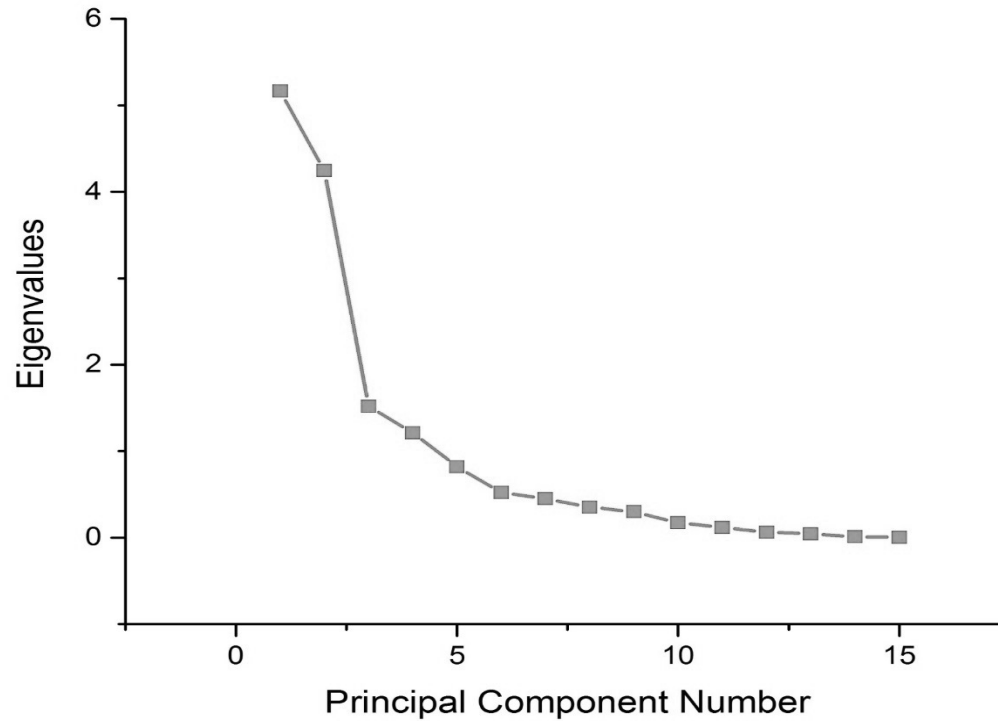

# MOLECULAR ECOLOGY RESOURCES

54  
55  
56 **Figure S2. Graph of the Total Yield (in Gb) versus the number of Total Reads Passing the Filter (Reads PF).** A single point  
57 represents a MiSeq run performed and data points are shown for all five MiSeq instruments.  $R^2$  value of the graph is 0.9742. Runs away  
58 from the straight line depicts MiSeq runs that presented issues properly reporting into the Illumina® SAV software.  
59

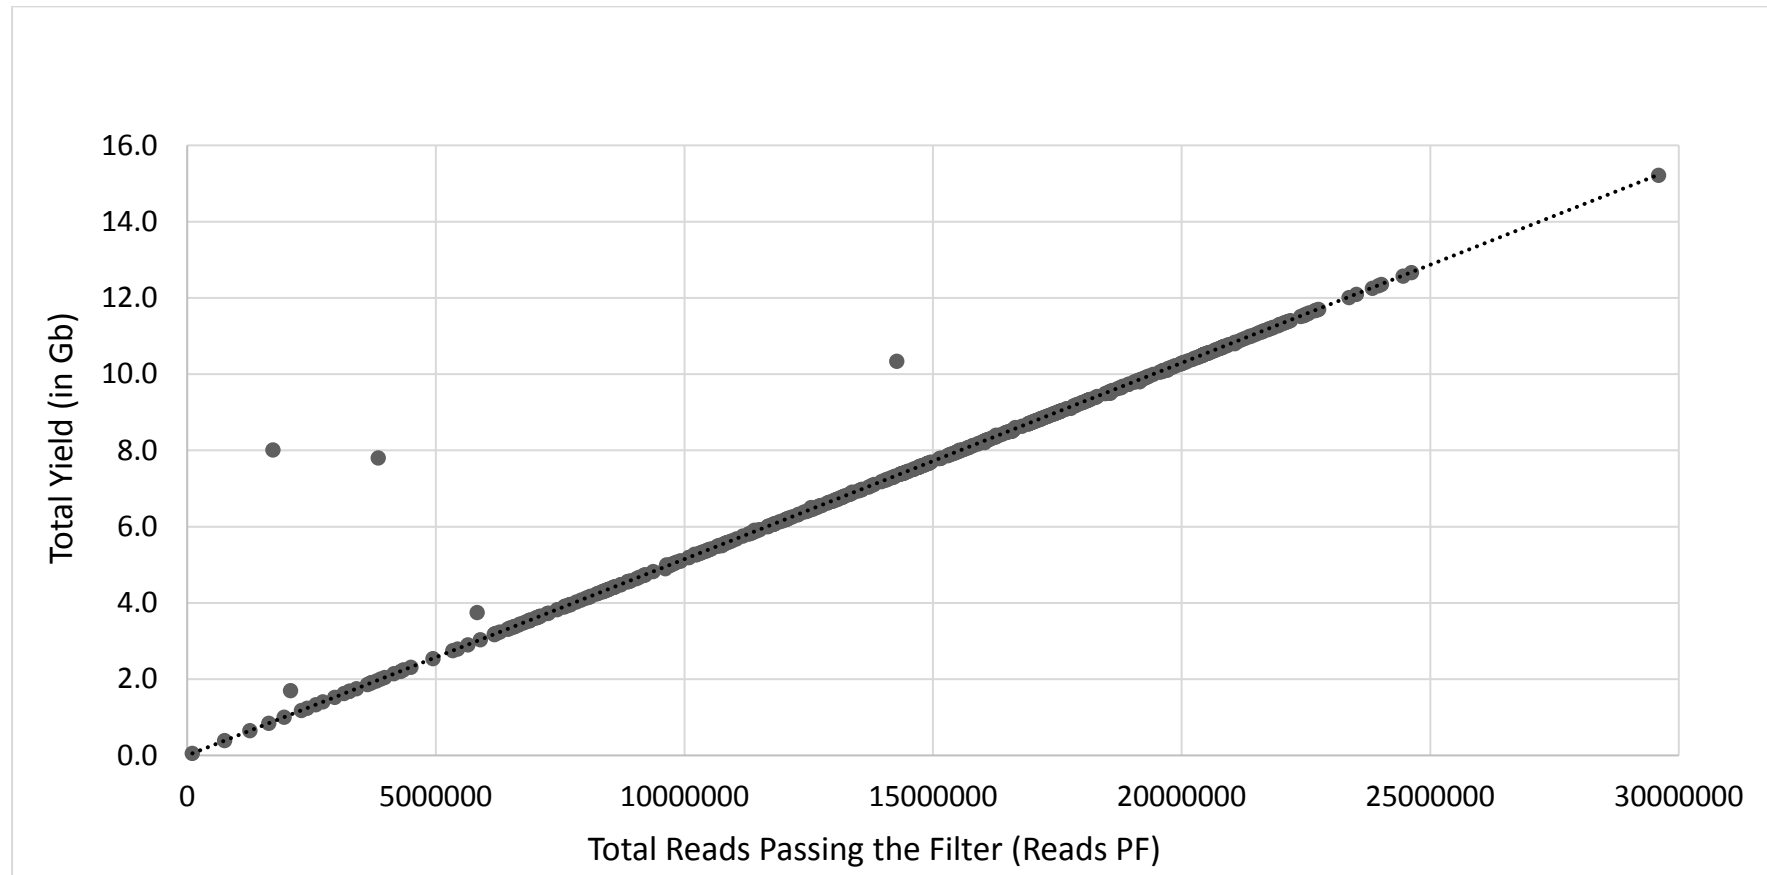

60

# MOLECULAR ECOLOGY RESOURCES

**Figure S3. Cluster Density range depicted with K-means.** MiSeq runs outside the manufacturer CD range (1000 K/mm<sup>2</sup>-1200 K/mm<sup>2</sup>) shown in red and runs within manufacturer recommended CD range shown in blue.

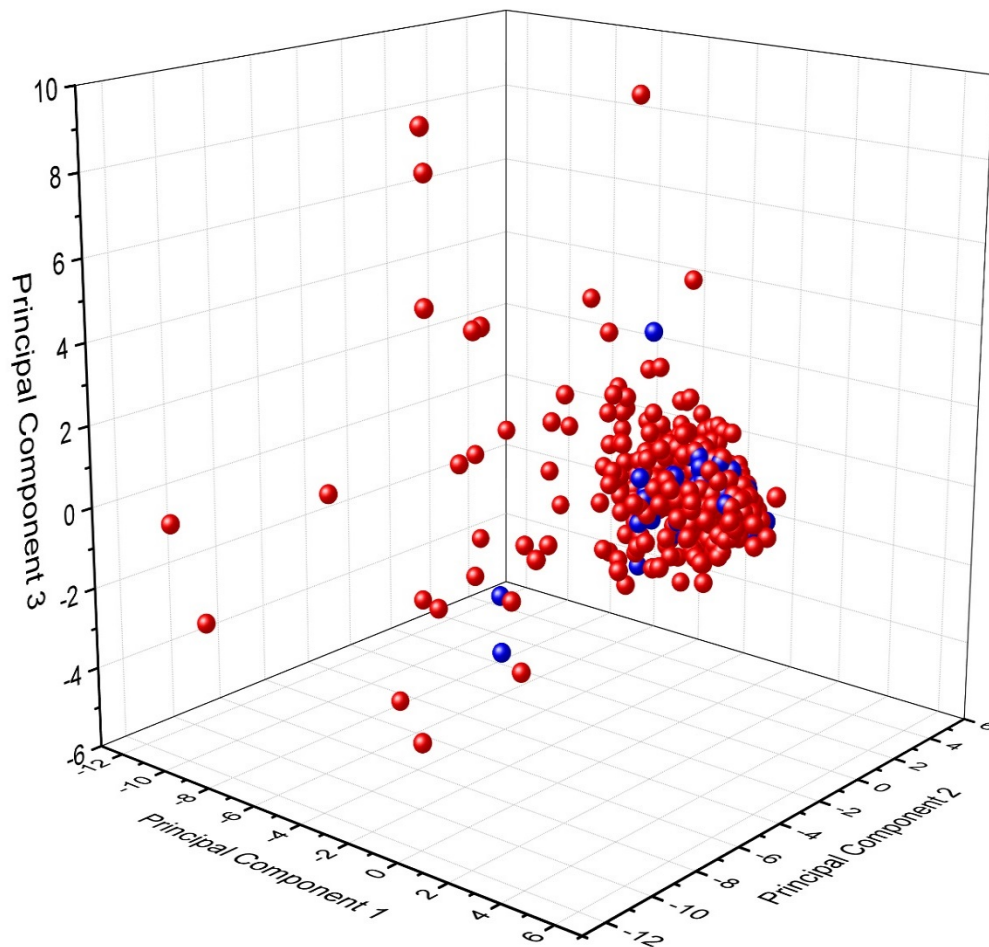

Supplement: MEN-19-377-s001.pdf [file MEN-19-377-s001.pdf]
